# Supplementary material for: Comparison of Consumption Data and Phenotypical Antimicrobial Resistance in E. coli Isolates of Human Urinary Samples and of Weaning and Fattening Pigs from Surveillance and Monitoring Systems in Germany
Source: MDPI journal article supplement (doi:10.3390/antibiotics11010028), 2021-12-27
Supplement: s1 [file s1]

**Table S1.** Clinical breakpoints from EUCAST (01.04.2021).

| Antimicrobial drug tested | Clinical breakpoints applied |
|---------------------------|------------------------------|
| ampicillin                | >8                           |
| cefotaxime                | >2                           |
| ciprofloxacin             | >0.5                         |
| co-trimoxazole            | >4                           |
| gentamicin                | >2                           |
| trimethoprim              | >4                           |

**Table S3.** Antimicrobial usage in Germany expressed as defined daily doses (DDD/100,000 inhabitants/day) in the human community (1) and as therapy frequency per 100 animal years of weaning and fattening pigs from 2015 to 2017(2). (3)

|                                          | 2015  | 2016 | 2017 | 2015        | 2016 | 2017 | 2015          | 2016 | 2017 |
|------------------------------------------|-------|------|------|-------------|------|------|---------------|------|------|
| Antibiotic class                         | Human |      |      | Weaning pig |      |      | Fattening pig |      |      |
| Aminoglycosides (J01G)                   | 1.43  | 1.4  | 1.38 | 164         | 108  | 106  | 24            | 16   | 12   |
| Beta-lactams, penicillins (J01C)         | 330   | 342  | 382  | 1774        | 1331 | 1263 | 289           | 230  | 206  |
| 3rd and 4th Cephalosporins (J01DD-J01DE) | 33.2  | 30.7 | 24.6 | 16          | 13   | 11   | 2             | 2    | 2    |
| Fluoro-quinolones (J01MA)                | 132   | 124  | 111  | 44          | 45   | 49   | 27            | 24   | 24   |
| Sulfonamides and trimethoprim (J01E)     | 47    | 46   | 46   | 148         | 122  | 81   | 37            | 19   | 12   |
| Trimethoprim und derivades (J01EA)       | 4.94  | 4.99 | 5.08 | NA          | NA   | NA   | NA            | NA   | NA   |

<sup>1</sup> European Centre for Disease Prevention and Control (ECDC). Antimicrobial consumption database (ESAC-Net).

<sup>2</sup> Matthias Flor, A.K., Heike Kaspar, Bernd-Alois Tenhagen, Jürgen Wallmann. Arbeitsgruppe Antibiotikaresistenz des Bundesinstituts für Risikobewertung und des Bundesamtes für Verbraucherschutz und Lebensmittelsicherheit. Themenkomplex 1: Entwicklung der Antibiotikaabgabe- und -verbrauchsmengen sowie der Therapiehäufigkeit.; 2019.

<sup>3</sup> Values were inflated by 100 as compared to standard values to minimise decimals.
